# Supplementary material for: Effective n-type de-doping of perovskite surface via defect passivation and improved film crystallization for high-efficiency inorganic solar cells
Source: Royal Society of Chemistry journal article supplement (doi:10.1039/d4ta03811h), 2024-01-01
Supplement: d4ta03811h1.pdf [file d4ta03811h1.pdf]

## Supporting Information

# Effective n-Type De-doping of Perovskite Surface by Defect Passivation and Improved Film Crystallization for High-Efficiency Inorganic Solar Cells

Hui Li,<sup>a,b</sup> Jialong Duan,<sup>a,\*</sup> Naimin Liu,<sup>a</sup> Linzheng Ma,<sup>a,\*</sup> Jie Dou,<sup>a</sup> Xinyu Zhang,<sup>a</sup> Qiyao Guo,<sup>a</sup>

Yuanyuan Zhao,<sup>c</sup> Benlin He,<sup>d</sup> and Qunwei Tang<sup>a,\*</sup>

<sup>a</sup> Institute of Carbon Neutrality, College of Chemical and Biological Engineering, Shandong  
University of Science and Technology, Qingdao 266590, PR China;

<sup>b</sup> Wuhan National Laboratory for Optoelectronics and School of Physics, Huazhong University of  
Science and Technology, Wuhan 430074, China;

<sup>c</sup> Institute of New Energy Technology, College of Information Science and Technology, Jinan  
University, Guangzhou 510632, PR China;

<sup>d</sup> School of Materials Science and Engineering, Ocean University of China, Qingdao 266590, PR  
China;

\*Corresponding Authors: [duanjialong@sdust.edu.cn](mailto:duanjialong@sdust.edu.cn); [skd996257@sdu.edu.cn](mailto:skd996257@sdu.edu.cn);

[tangqunwei@sdust.edu.cn](mailto:tangqunwei@sdust.edu.cn).

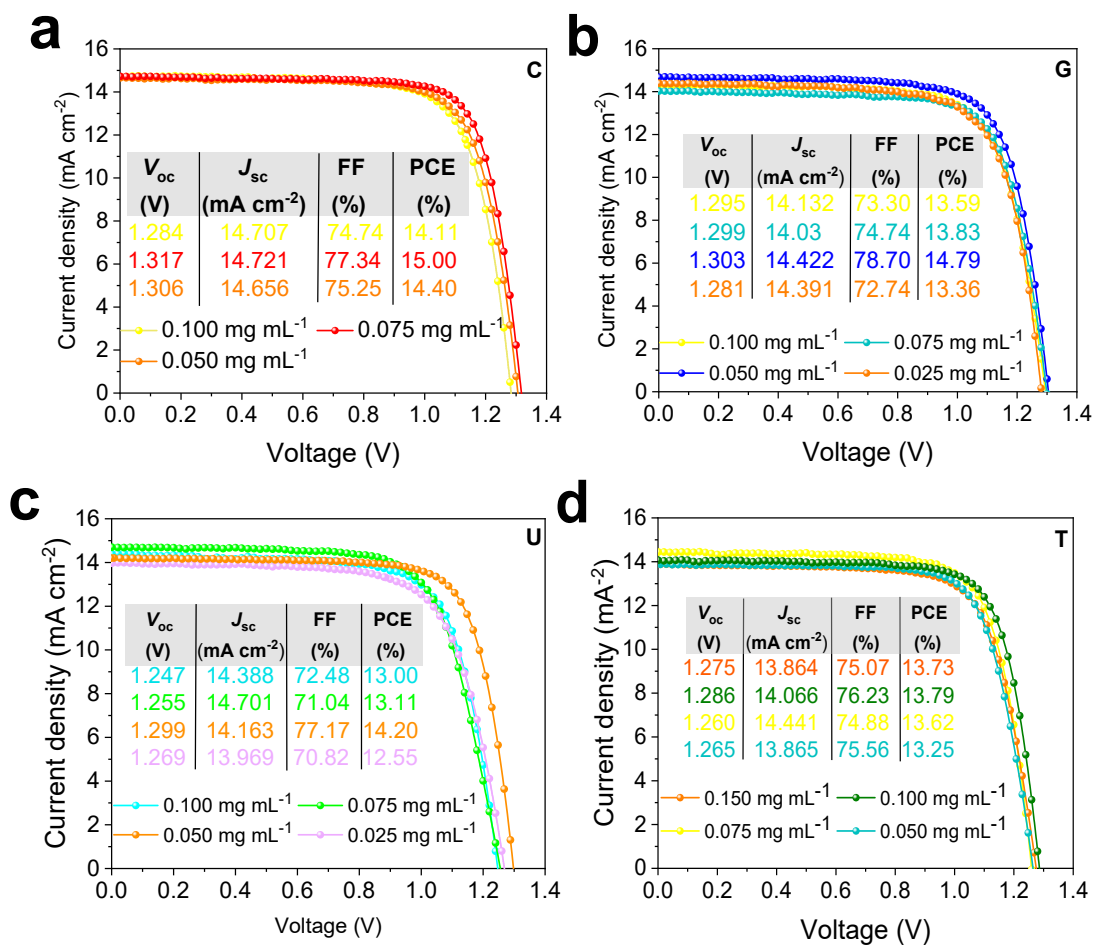

**Fig. S1**  $J$ - $V$  curves of the prepared  $\text{CsPbI}_2\text{Br}$  devices treated by (a) cytosine (b) guanine (c) uracil (d) thymine.

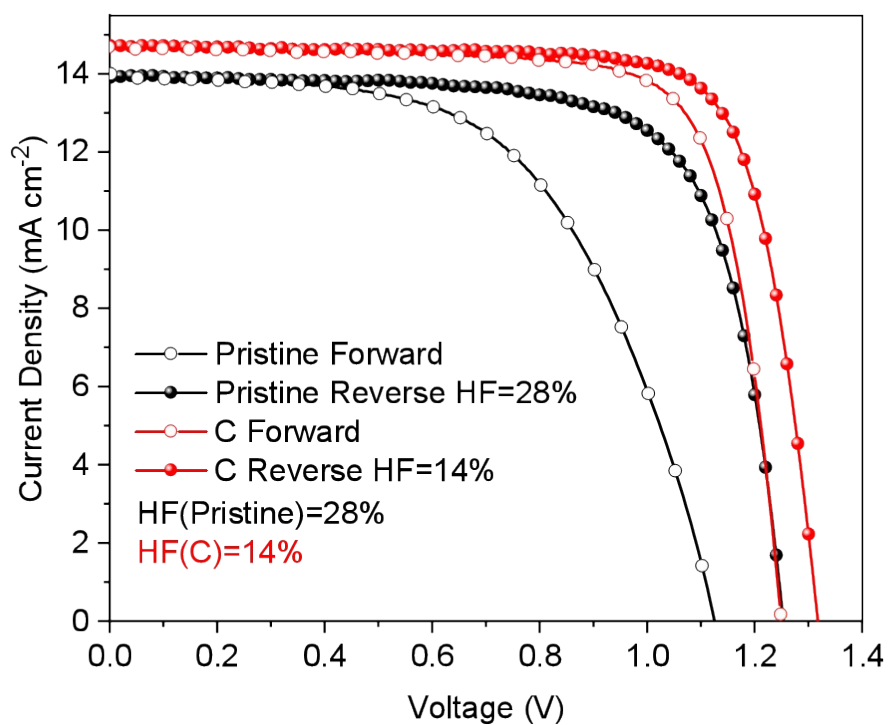

**Fig. S2** The characteristic  $J-V$  curves of pristine and C-treated PSCs under forward and reverse scanning directions. The calculation formula of hysteresis factor is  $\text{HF} = (\text{PCE}_{\text{rev}} - \text{PCE}_{\text{for}}) / \text{PCE}_{\text{rev}}$ .

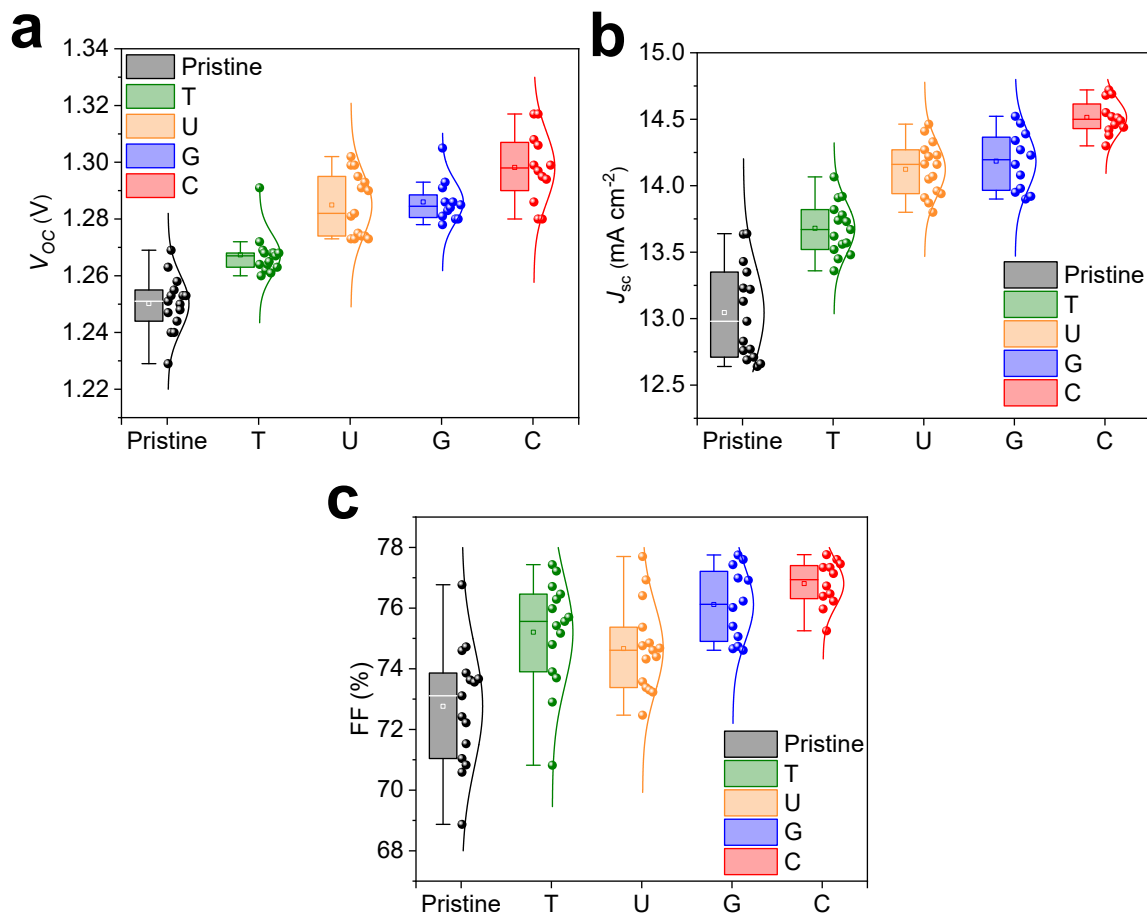

**Fig. S3** The statistical photovoltaic parameters distribution including (a)  $V_{OC}$ , (b)  $J_{SC}$  and (c) FF.

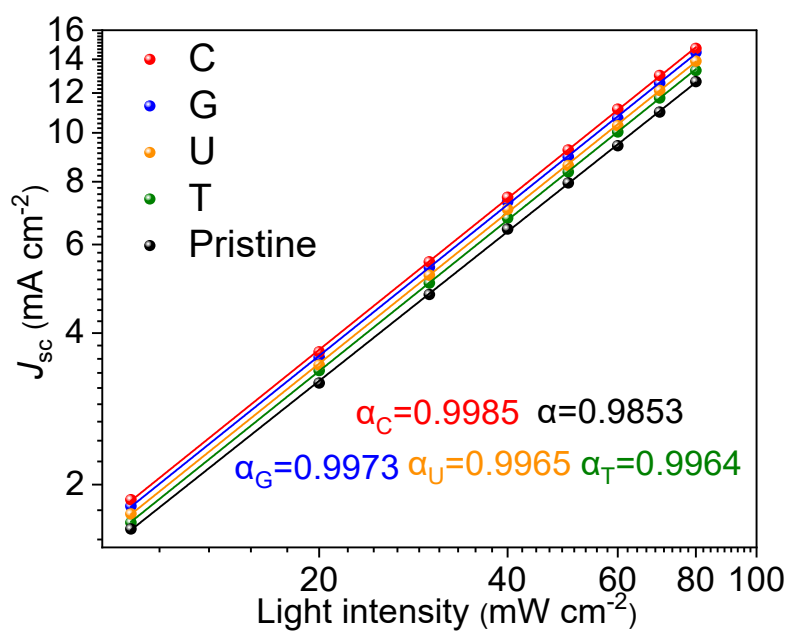

**Fig. S4**  $J_{SC}$  dependence of CsPbI<sub>2</sub>Br devices on light intensity.

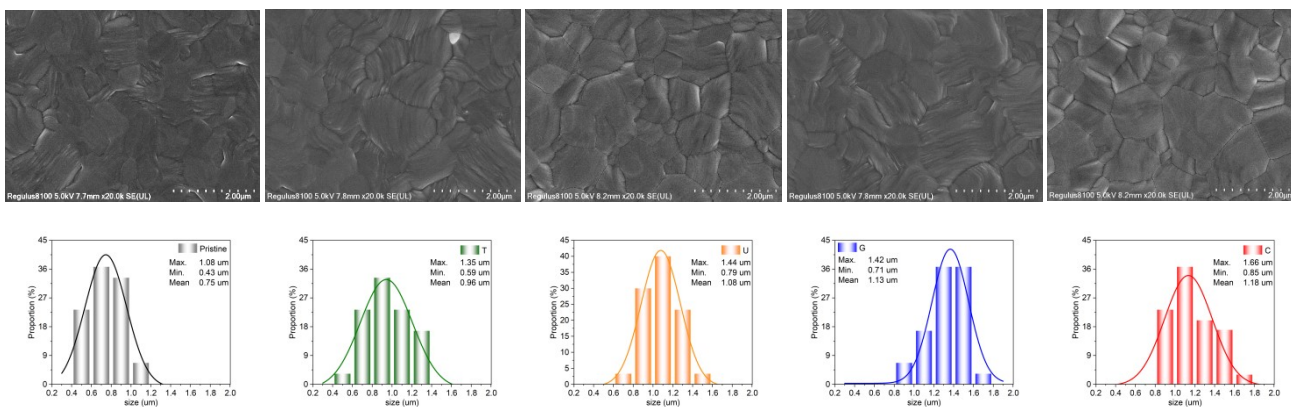

**Fig. S5** Top-view SEM images and particle size distribution maps of CsPbI<sub>2</sub>Br perovskite films.

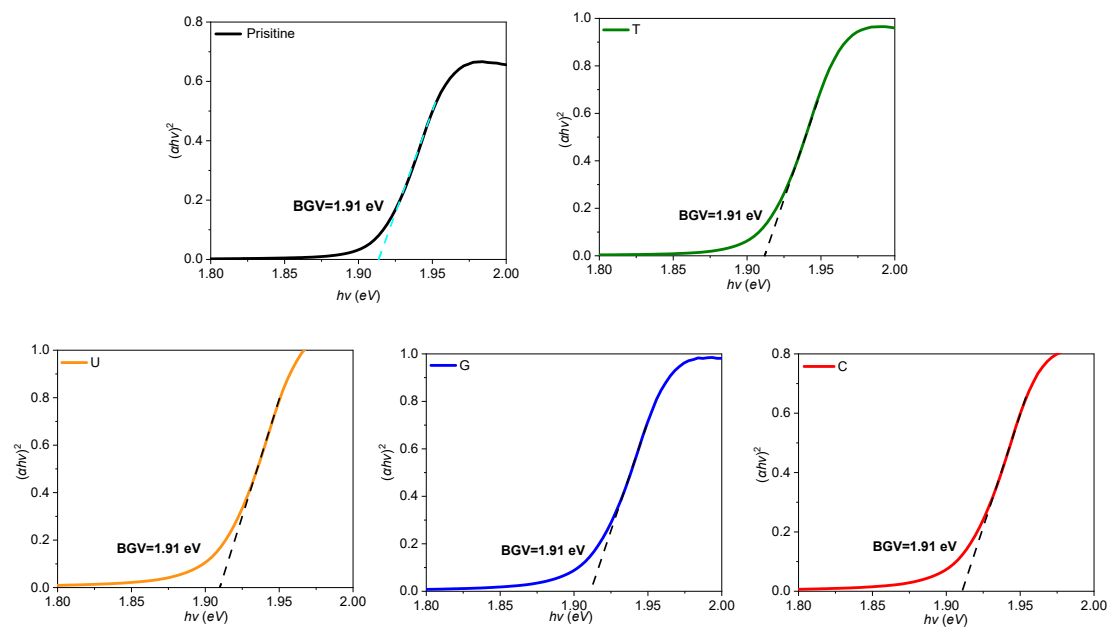

**Fig. S6** Bandgaps of CsPbI<sub>2</sub>Br perovskite films.

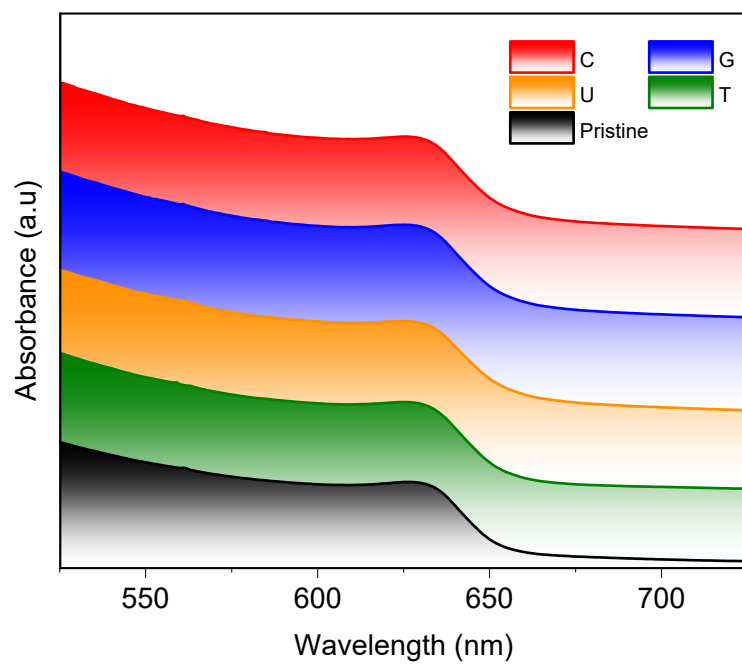

**Fig. S7** UV-vis spectra of CsPbI<sub>2</sub>Br perovskite films.



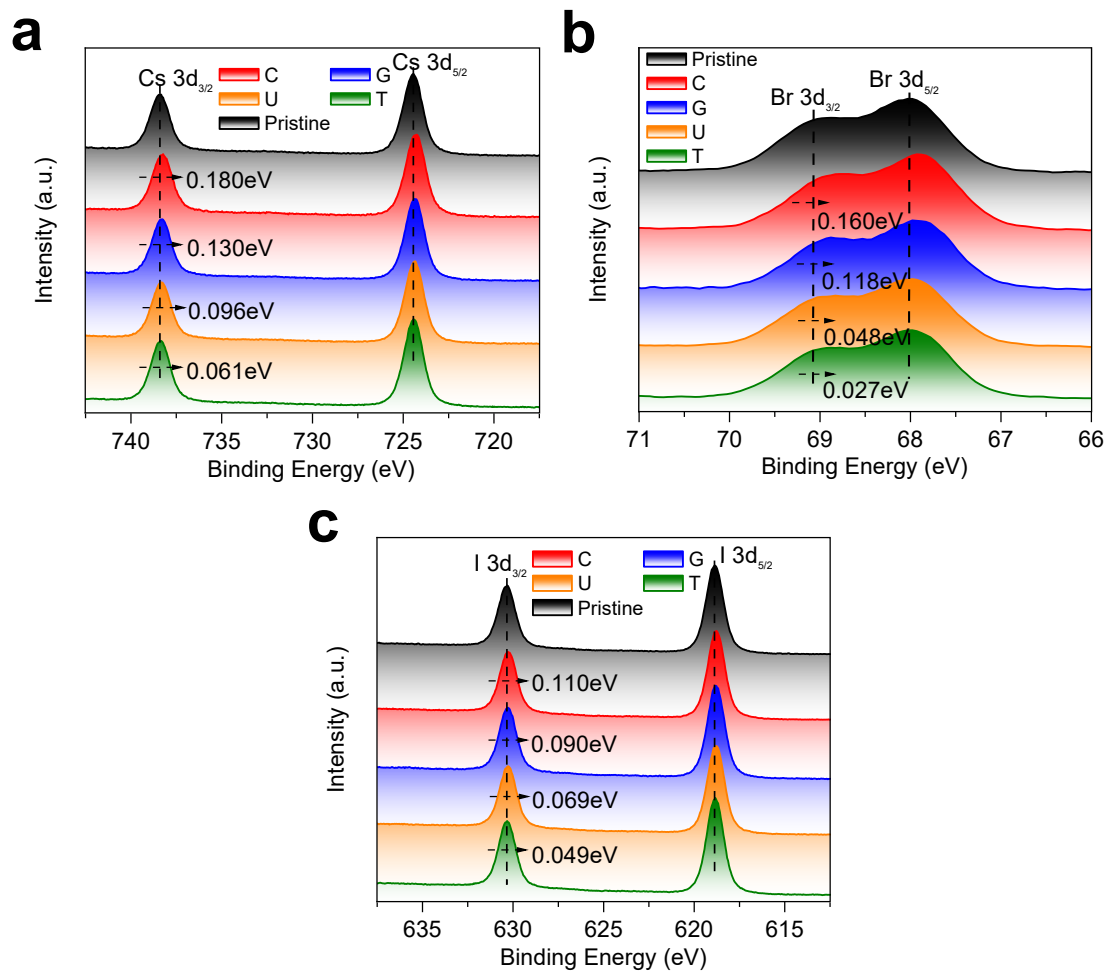

**Fig. S8** XPS spectra of (a) Cs 3d, (b) Br 3d and (c) I 3d.

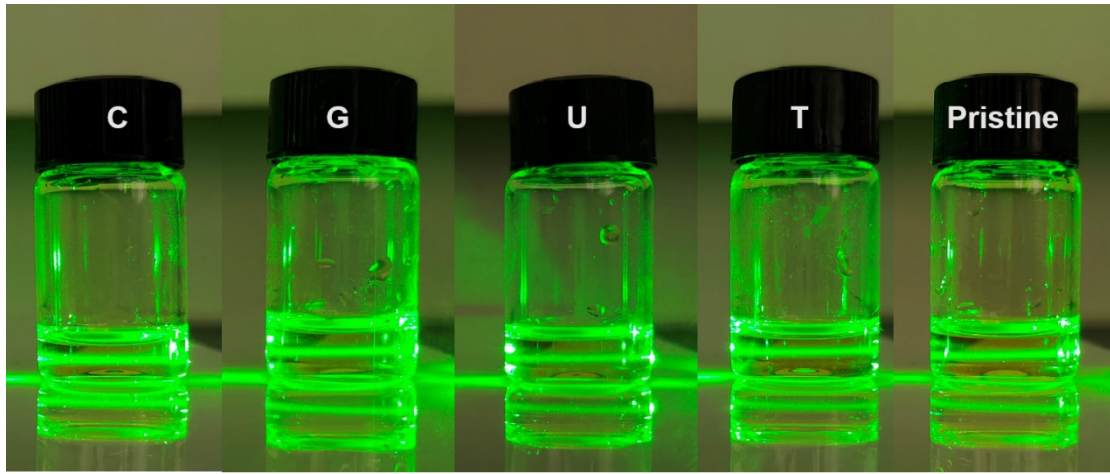

**Fig. S9** Tyndall effect of perovskite precursor solutions with different molecules.

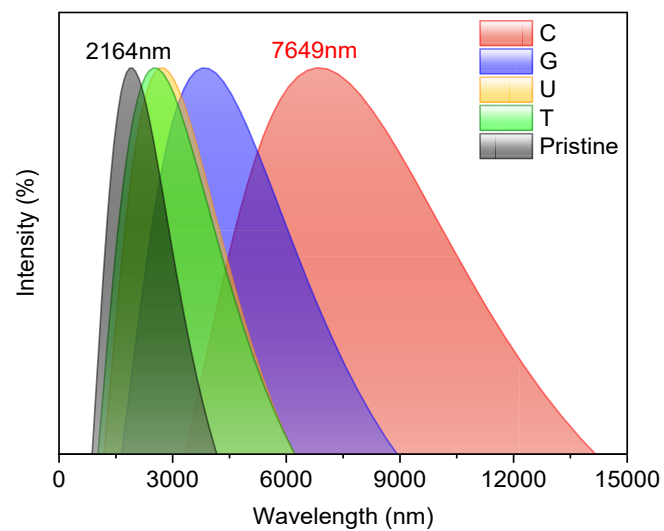

**Fig. S10** The statistical size distribution of colloids in perovskite solutions.

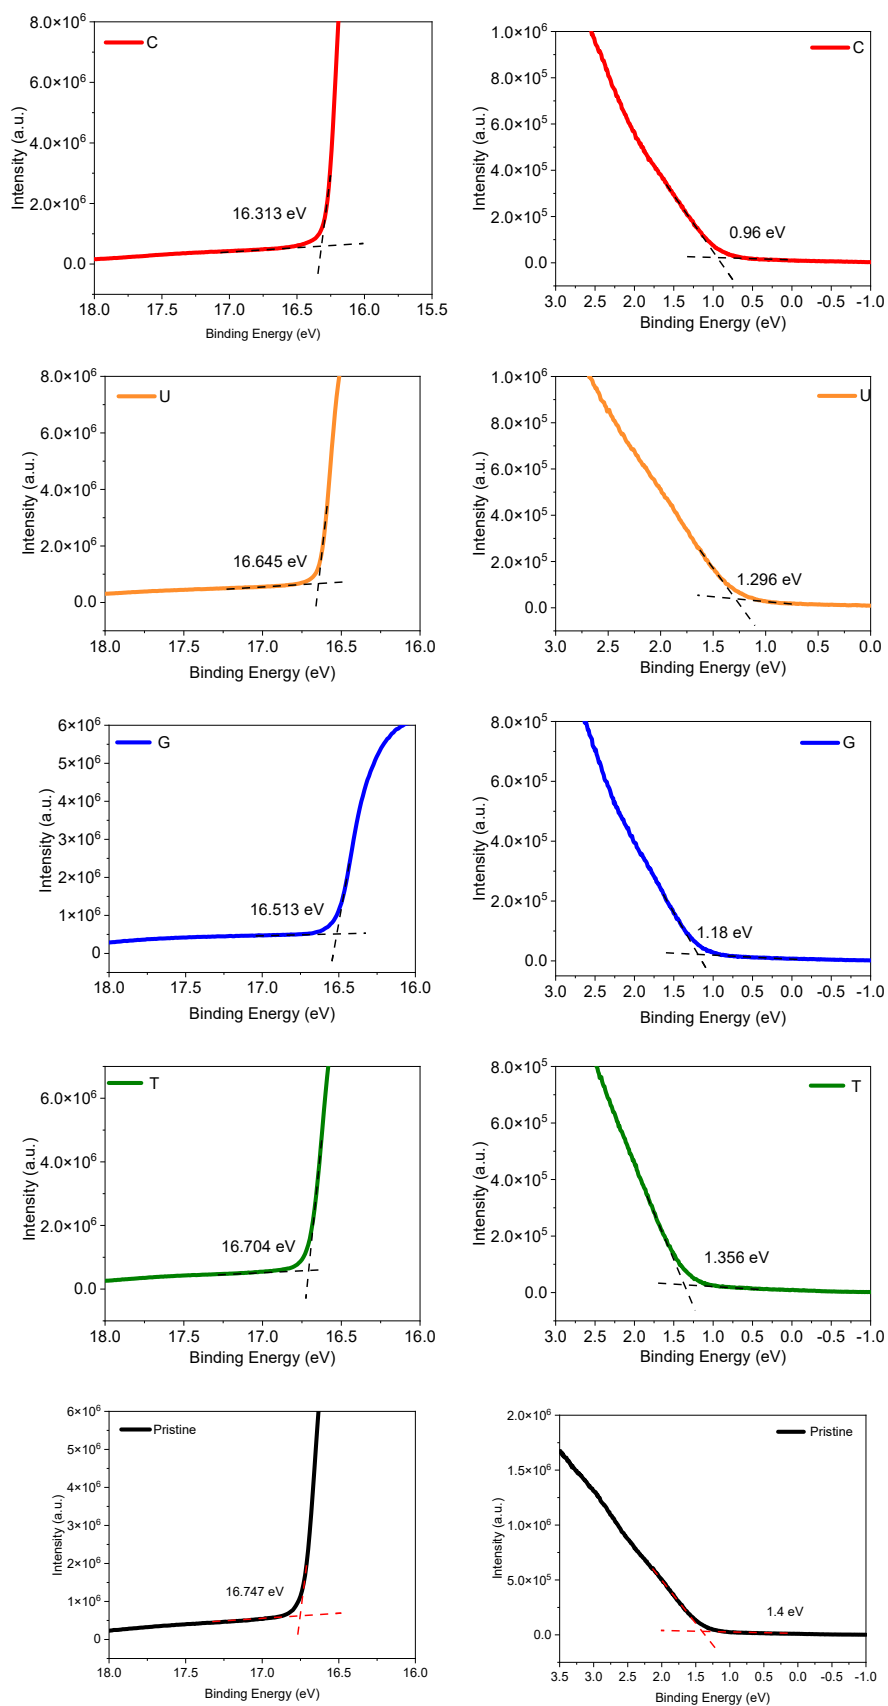

**Fig. S11** UPS spectra of various perovskite films.

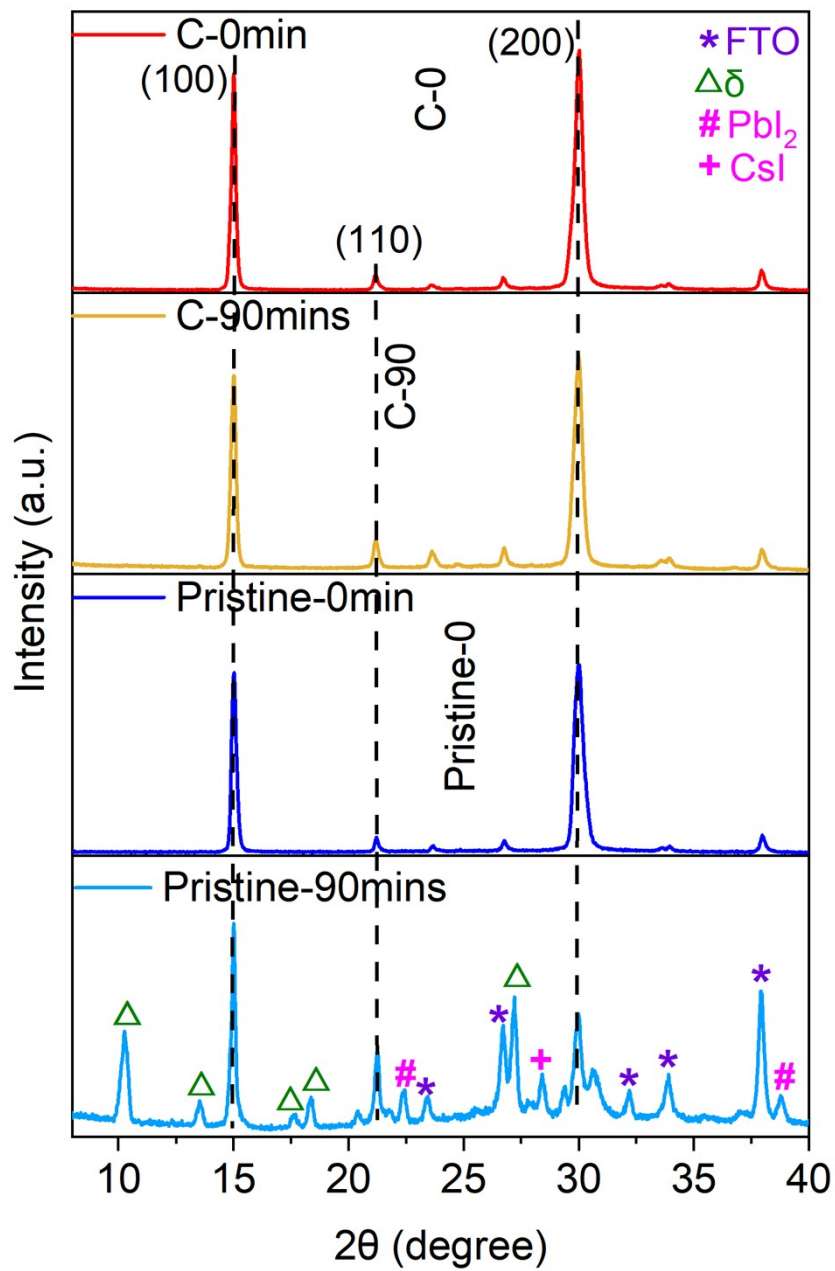

**Fig. S12** XRD spectra of perovskite films on  $\text{TiO}_2$  substrates before and after aging treatment.

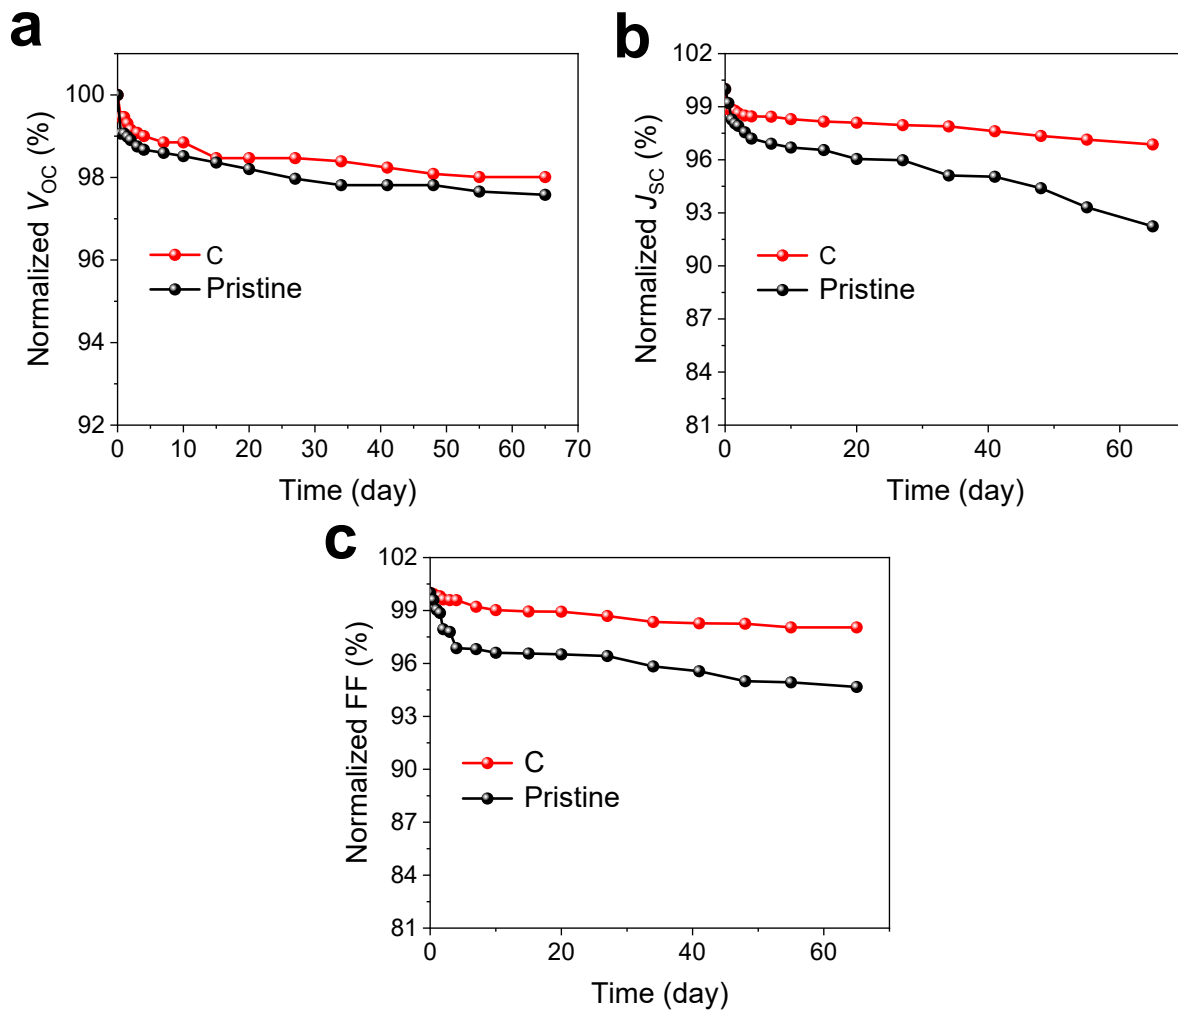

**Fig. S13** Normalized photovoltaic parameters of PSCs treated with and without Cytosine including (a)  $J_{SC}$ , (b)  $V_{OC}$  and (c) FF under 25 °C and 10% RH.

**Table S1** Photovoltaic parameters of CsPbI<sub>2</sub>Br PSCs treated by cytosine with various concentrations.

| Cytosine (mg mL <sup>-1</sup> ) | $V_{OC}$ (V) | $J_{SC}$ (mA cm <sup>-2</sup> ) | FF (%) | PCE (%) |
|---------------------------------|--------------|---------------------------------|--------|---------|
| 0.050                           | 1.284        | 14.707                          | 74.74  | 14.11   |
| 0.075                           | 1.317        | 14.712                          | 77.34  | 15.00   |
| 0.100                           | 1.306        | 14.656                          | 75.25  | 14.40   |

**Table S2** Photovoltaic parameters of CsPbI<sub>2</sub>Br PSCs treated by guanine with various concentrations.

| Guanine (mg mL <sup>-1</sup> ) | $V_{OC}$ (V) | $J_{SC}$ (mA cm <sup>-2</sup> ) | FF (%) | PCE (%) |
|--------------------------------|--------------|---------------------------------|--------|---------|
| 0.025                          | 1.281        | 14.39                           | 72.74  | 13.36   |
| 0.050                          | 1.303        | 14.42                           | 78.70  | 14.79   |
| 0.075                          | 1.299        | 14.03                           | 74.74  | 13.83   |
| 0.100                          | 1.295        | 14.13                           | 73.30  | 13.59   |

**Table S3** Photovoltaic parameters of CsPbI<sub>2</sub>Br PSCs treated by uracil with various concentrations.

| Uracil (mg mL <sup>-1</sup> ) | $V_{OC}$ (V) | $J_{SC}$ (mA cm <sup>-2</sup> ) | FF (%) | PCE (%) |
|-------------------------------|--------------|---------------------------------|--------|---------|
| 0.025                         | 1.269        | 13.969                          | 70.82  | 12.55   |
| 0.050                         | 1.399        | 14.163                          | 71.04  | 14.20   |
| 0.075                         | 1.255        | 14.701                          | 77.17  | 13.11   |
| 0.100                         | 1.247        | 14.388                          | 72.48  | 13.00   |

**Table S4** Photovoltaic parameters of CsPbI<sub>2</sub>Br PSCs treated by thymine with various concentrations.

| Thymine (mg mL <sup>-1</sup> ) | $V_{OC}$ (V) | $J_{SC}$ (mA cm <sup>-2</sup> ) | FF (%) | PCE (%) |
|--------------------------------|--------------|---------------------------------|--------|---------|
| 0.050                          | 1.265        | 13.865                          | 75.56  | 13.25   |
| 0.070                          | 1.260        | 14.441                          | 74.88  | 13.62   |
| 0.100                          | 1.286        | 14.066                          | 76.23  | 13.79   |
| 0.150                          | 1.265        | 13.864                          | 75.07  | 13.73   |
